# Supplementary material for: Insights into Photocatalytic Degradation Pathways and Mechanism of Tetracycline by an Efficient Z-Scheme NiFe-LDH/CTF-1 Heterojunction
Source: MDPI journal article supplement (doi:10.3390/nano12234111), 2022-11-22
Supplement: s1 [file s1]

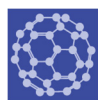

# Insights into Photocatalytic Degradation Pathways and Mechanism of Tetracycline by an Efficient Z-Scheme NiFe-LDH/CTF-1 Heterojunction

Jinpeng Zhang <sup>1</sup>, Xiaoping Chen <sup>1</sup>, Qiaoshan Chen <sup>1</sup>, Yunhui He <sup>2</sup>, Min Pan <sup>3</sup>, Guocheng Huang <sup>1,\*</sup> and Jinhong Bi <sup>1,\*</sup>

<sup>1</sup> School of Environmental Science and Engineering, Fuzhou University, Fuzhou 350108, China

<sup>2</sup> Fujian College Association Instrumental Analysis Center of Fuzhou University, Fuzhou 350108, China

<sup>3</sup> Department of Applied Science, School of Science and Technology, Hong Kong Metropolitan University, Ho Man Tin, Kowloon, Hong Kong SAR, China

\* Correspondence: sysuhgc@gmail.com or huanggch@fzu.edu.cn (G.H.); bijinhong@fzu.edu.cn (J.B.)

## 1. Methods

### 1.1. Material and Electrochemical Characterization

Powder X-ray diffraction (PXRD) patterns were obtained on a Bruker D8-advance (Billerica, MA, USA) diffractometer equipped with Cu K $\alpha$  radiation, operating at a 2 $\theta$  range from 5° to 80°. Fourier transform infrared (FT-IR) spectra were recorded in the range 4000 to 600 cm<sup>-1</sup> by using KBr pellets on a Thermo Scientific Nicolet iS10 spectrometer (Boston, MA, USA). X-ray photoelectron spectroscopy (XPS) measurements were performed on a PHI Quantum 2000 XPS (Washington, WA, USA) system equipped with a monochromatic Al K $\alpha$  X-ray source. The C 1s peak (284.6 eV) of the surface adventitious carbon was used as the internal reference. Ultra-high resolution scanning electron microscopy (HRSEM) images and Transmission electron microscopy (TEM) images were collected using a Verios G4 UC microscopy (FEI Corp., Hillsboro, OR, USA) and a Tecnai G2 F20 microscope (FEI Corp., Hillsboro, OR, USA), respectively. Nitrogen adsorption and desorption isotherms were carried out at 77 K on an ASAP 2020 apparatus (Micromeritics Instrument Corp., Norcross, GE, USA) and the Brunauer-Emmett-Teller (BET) method was used to calculate the surface area. UV-vis diffuse reflectance spectra (UV-vis DRS) were measured with a Varian Cary 500 UV-vis spectrophotometer (Palo Alto, CA, USA) by using the powder samples with BaSO<sub>4</sub> as the reflectance standard. The photoluminescence (PL) spectra were recorded using an Edinburgh FL/FS 900 (Edinburgh, United Kingdom) spectrophotometer with 330 nm excitation light. The electron spin response (ESR) signals of free radicals were examined on a spectrometer (Bruker A300, Billerica, MA, USA) under visible light irradiation ( $\lambda > 420$  nm) using 5,5-dimethyl-1-pyrroline N-oxide (DMPO) as a spin-trapped reagent.

The electrochemical properties of the catalysts were determined in a cell with three electrodes on a CHI650E electrochemical workstation. The as-prepared sample, a platinum sheet and Ag/AgCl were applied as the working, reference and counter electrodes, respectively. We fabricated the working electrode through the following process: a 5 mg photocatalyst was immersed in 0.5 mL N, N-dimethylformamide (DMF) and sonicated for 30 min, and then the 10  $\mu$ L suspension was coated onto fluoride-tin oxide (FTO) glass with a size of 0.5 cm  $\times$  0.5 cm. The other area of the FTO glass was smeared with epoxy resin to keep insulated, and then the electrode was dried overnight. The Mott-Schottky and electrochemical impedance spectroscopy (EIS) plots were evaluated through a ZAHNER IM6 in a mixed aqueous solution of KCl (0.1 M), Na<sub>2</sub>SO<sub>4</sub> (0.2 M), K<sub>3</sub>[Fe(CN)<sub>6</sub>] (5 mM) and K<sub>4</sub>[Fe(CN)<sub>6</sub>] (5 mM). The photocurrent data were recorded on the CHI650E

electrochemical workstation, where the electrolyte and a light source were 0.2 M Na<sub>2</sub>SO<sub>4</sub> and a 300 W Xe lamp equipped with a 420 nm filter, respectively.

### 1.2. Identification of the Degradation Intermediates

The degradation intermediates of TC were identified by a TSQ Quantum Access MAX LC-MS system (Boston, MA, USA) equipped with an Agilent ZORBAX Eclipse Plus C18 (Palo Alto, CA, USA) column (250 × 4.6 mm, 5 µm). The isocratic mobile phase was 0.1% (v/v) of formic acid aqueous solution and acetonitrile (70:30) at a flow rate of 0.8 mL min<sup>-1</sup>. The injection volume was 10 µL, and the column temperature was 30 °C. UV absorption, at a wavelength of 360 nm, was used for detection. And eluted compounds were detected between m/z 50 and 600.

## 2. Supplementary Figures

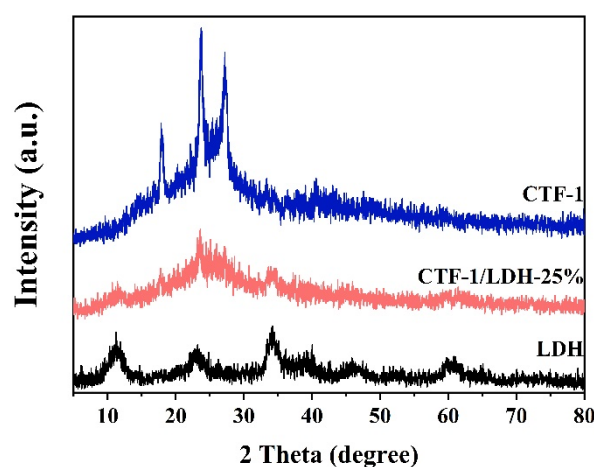

Figure S1. XRD patterns of pure LDH, CTF-1, and the CTF-1/LDH-25%.

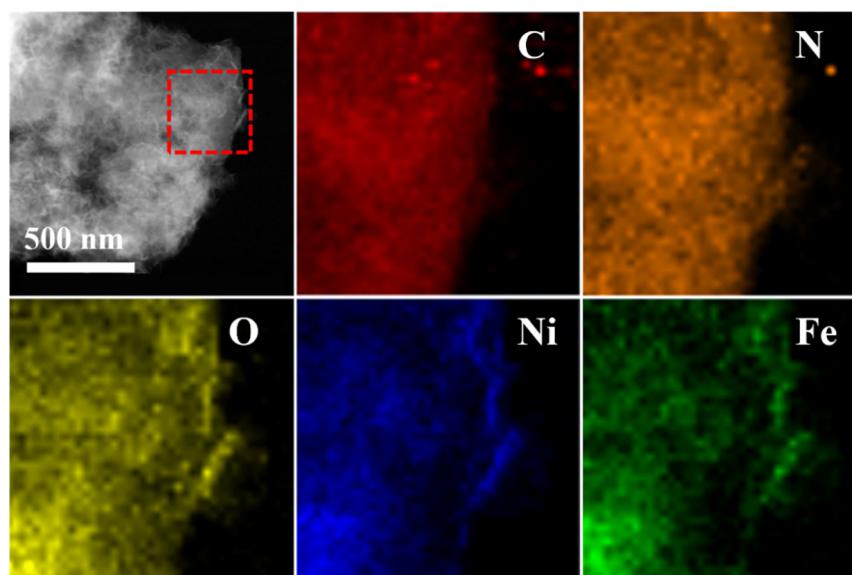

Figure S2. EDX elemental mapping images of the LDH/CTF-1-40% nanocomposite.

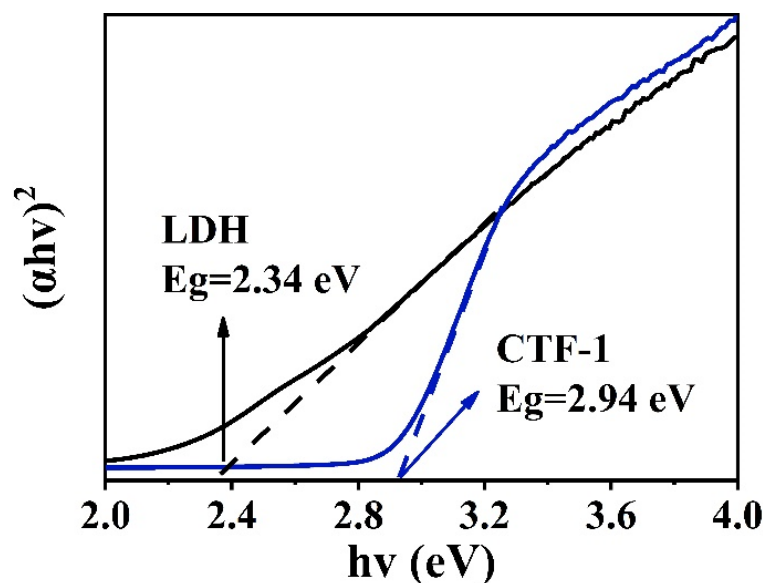

**Figure S3.** Plots of  $(\alpha h\nu)^2$  vs. the energy of absorbed light for pure LDH, CTF-1 and the LDH/CTF-1 nanocomposites.

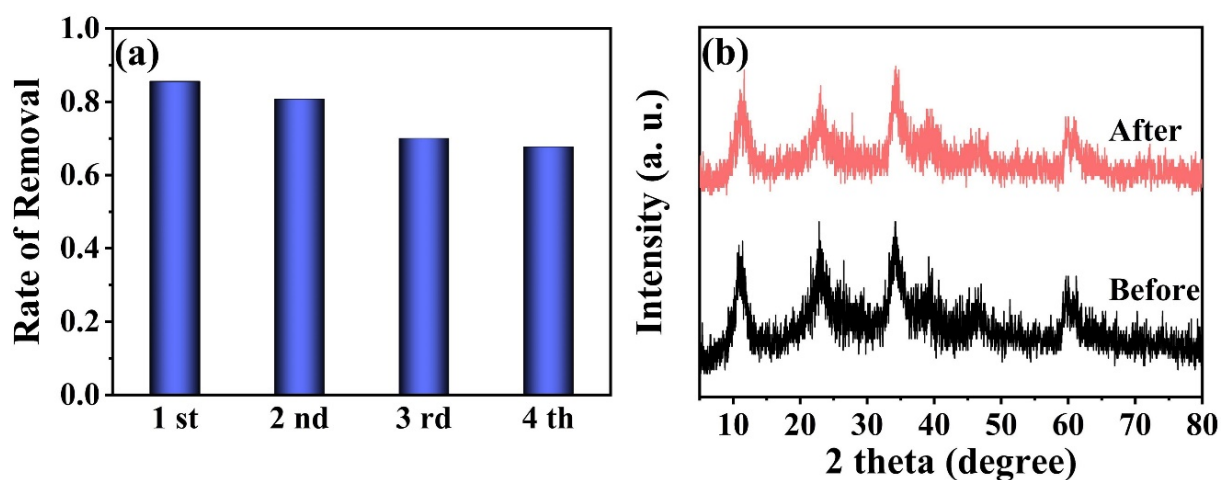

**Figure S4.** Cycling runs for degradation efficiency of TC (a) and XRD patterns of before and after reaction (b) over the LDH/CTF-1-40%.

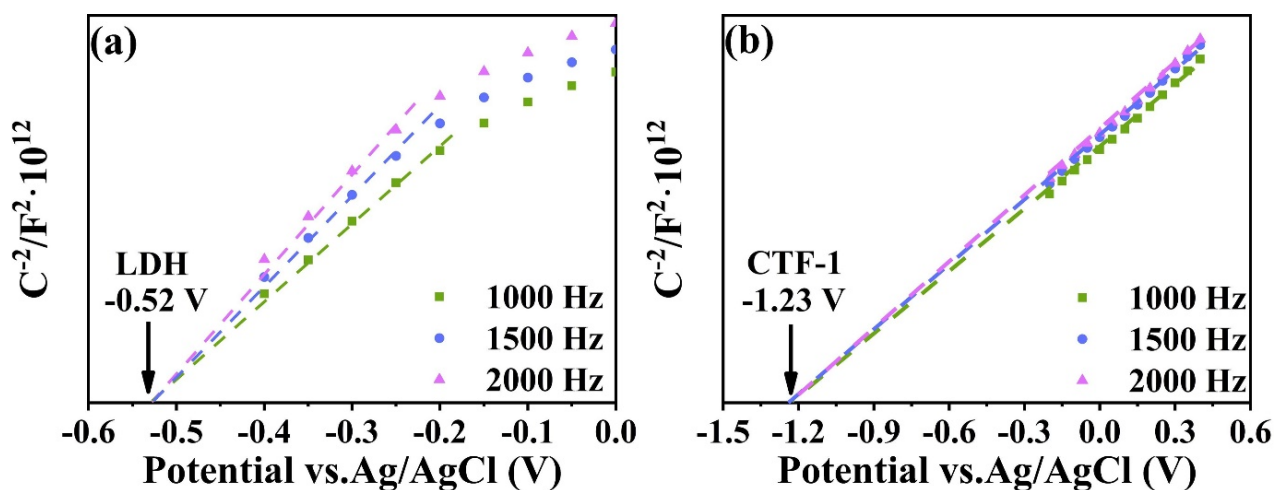

**Figure S5.** Mott-Schottky of LDH (a) and CTF-1 (b).

**Table S1.** Toxicity prediction of TC and its intermediates.

| Toxic endpoint | Fathead minnow<br>LC <sub>50</sub> -96 h<br>(mg L <sup>-1</sup> ) | Oral rat LD <sub>50</sub><br>(mg L <sup>-1</sup> ) | Mutagenicity        |
|----------------|-------------------------------------------------------------------|----------------------------------------------------|---------------------|
| TC             | 0.90                                                              | 1068.64                                            | 0.60<br>(positive)  |
| P1             | 0.79<br>(-)                                                       | 1615.37<br>(+)                                     | 0.64<br>(positive)  |
| P2             | 0.47<br>(-)                                                       | 1568.39<br>(+)                                     | 0.65<br>(positive)  |
| P3             | 2.75<br>(+)                                                       | 1317.21<br>(+)                                     | 0.81<br>(positive)  |
| P4             | 603.22<br>(+)                                                     | 1656.29<br>(+)                                     | 0.23<br>(negative)  |
| P5             | 0.85<br>(+)                                                       | 1029.30<br>(-)                                     | 0.65<br>(positive)  |
| P6             | 3.36<br>(+)                                                       | NA                                                 | 0.91<br>(positive)  |
| P7             | 90.24<br>(+)                                                      | 3679.6<br>(+)                                      | 0.13<br>(negative)  |
| P8             | 3.74<br>(+)                                                       | NA                                                 | -0.03<br>(negative) |
